# Supplementary figures and images for: Midface Osteotomies for Feminization of the Facial Skeleton
Source: PubMed Central journal article supplement — Plast Reconstr Surg Glob Open. 2017 Jan 24;5(1):e1210. doi: 10.1097/GOX.0000000000001210 (PMC5293308; doi:10.1097/gox.0000000000001210), 2017-01-24

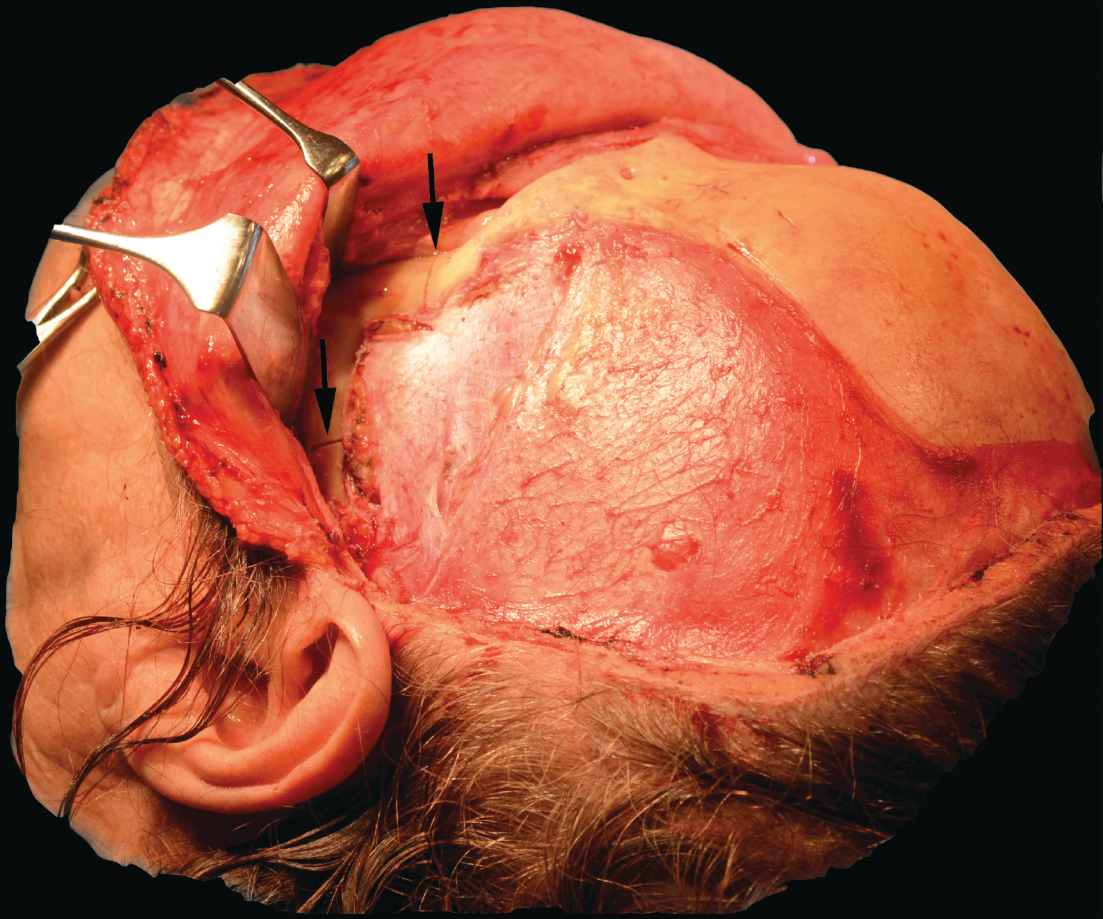

Supplement: gox-5-e1210-s001.pdf [file gox-5-e1210-s001.pdf]

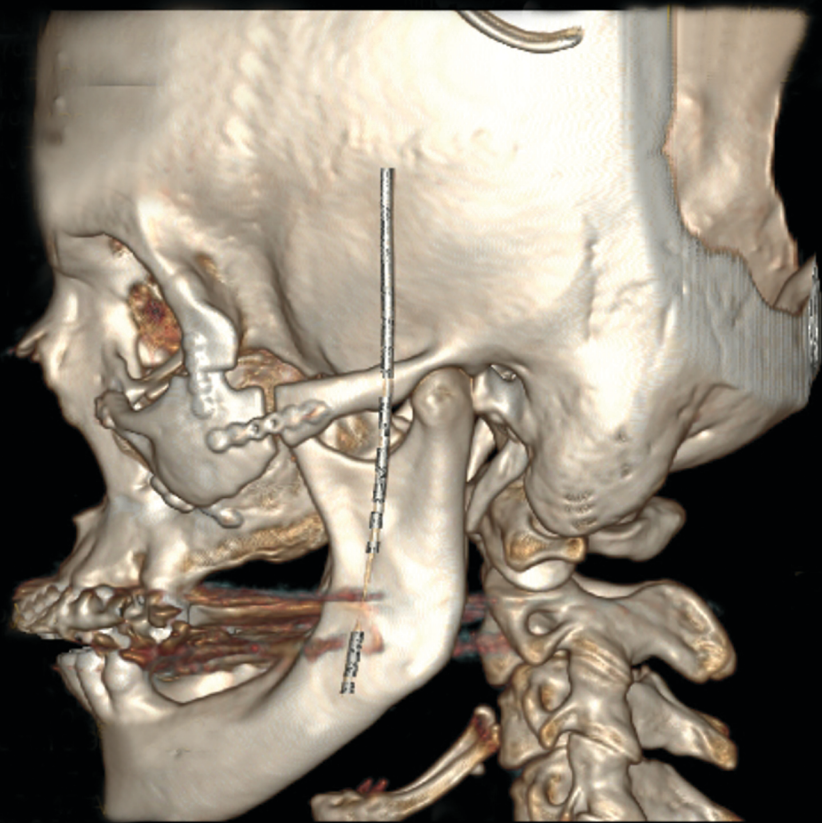

Supplement: gox-5-e1210-s002.pdf [file gox-5-e1210-s002.pdf]

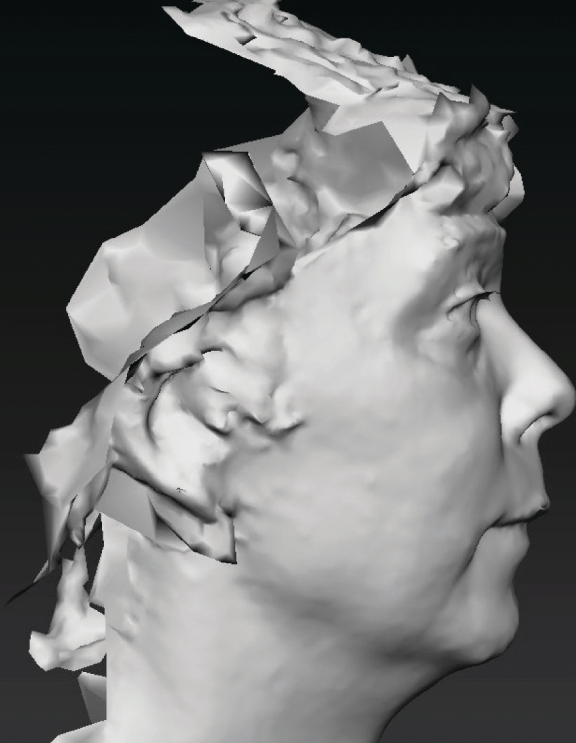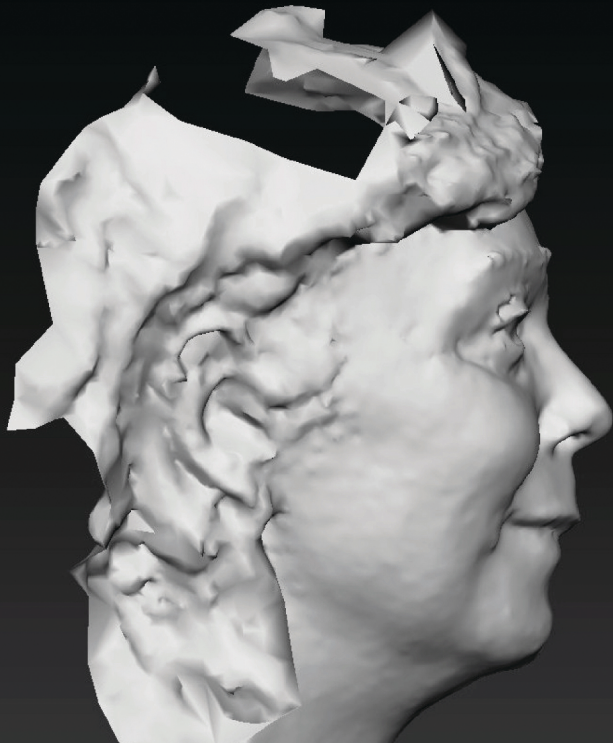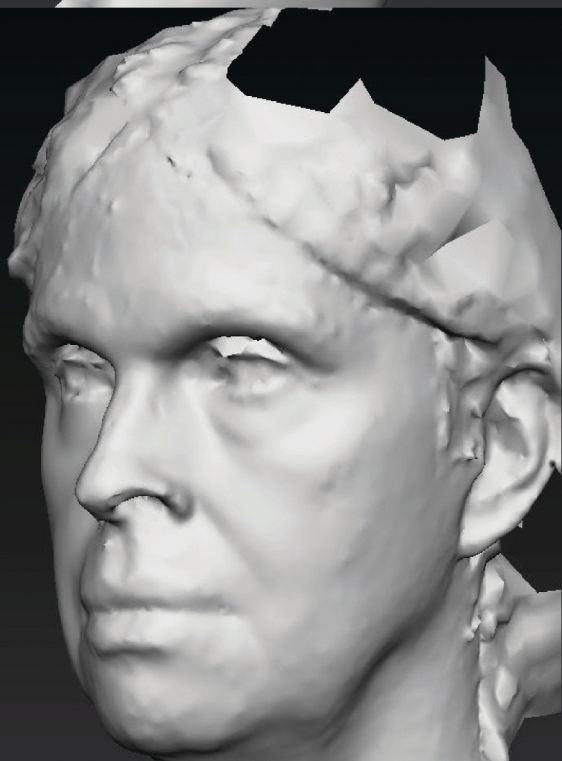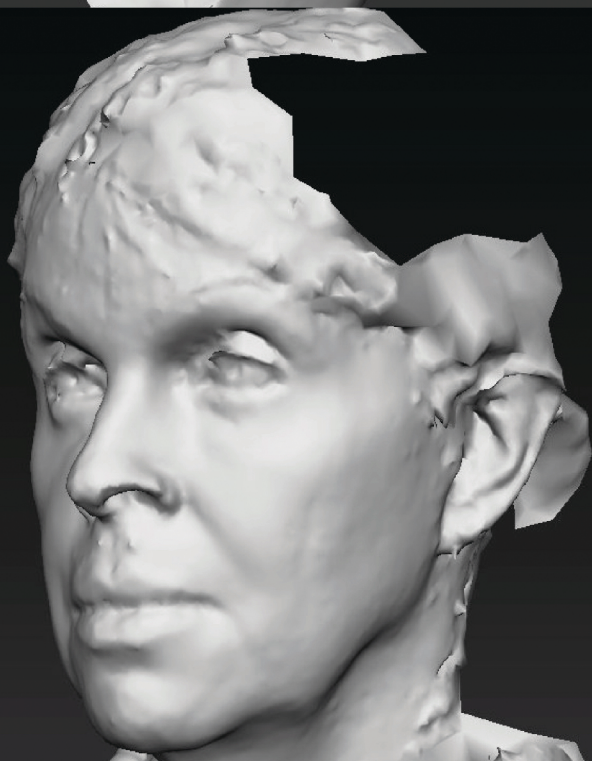

Supplement: gox-5-e1210-s003.pdf [file gox-5-e1210-s003.pdf]
